# Supplementary material for: Exploring Mitochondrial Localization of SARS-CoV-2 RNA by Padlock Assay: A Pilot Study in Human Placenta
Source: MDPI journal article supplement (doi:10.3390/ijms23042100), 2022-02-14

Table S1. Oligos used in this study.

|                                   |                                                                                               |
|-----------------------------------|-----------------------------------------------------------------------------------------------|
| Padlock Probe<br>NSP7             | 5'ACATTGAGCCCACATTTTTTCTCAATTCTGCTACTTTACTACCTCAATTCTGCTACTG<br>TACTACTTTTTTCATTGTGTAAGTGA 3' |
| RCA Primer                        | AGTACAGTAGCAGAATTGAG                                                                          |
| AlexaFluor 595-<br>labelled probe | CTCAATTCTGCTACTTTACTAC                                                                        |

### SARS-CoV-2 RNA-positive

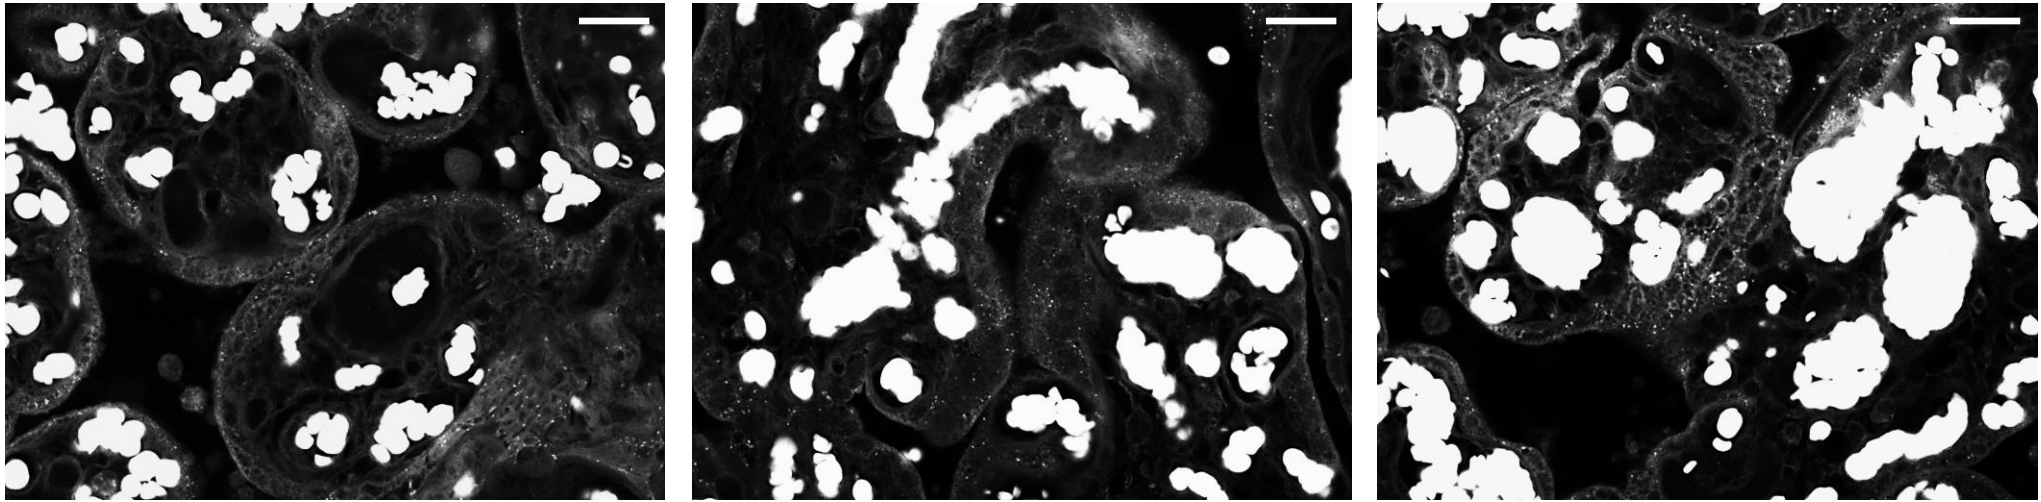

### SARS-CoV-2 RNA-negative

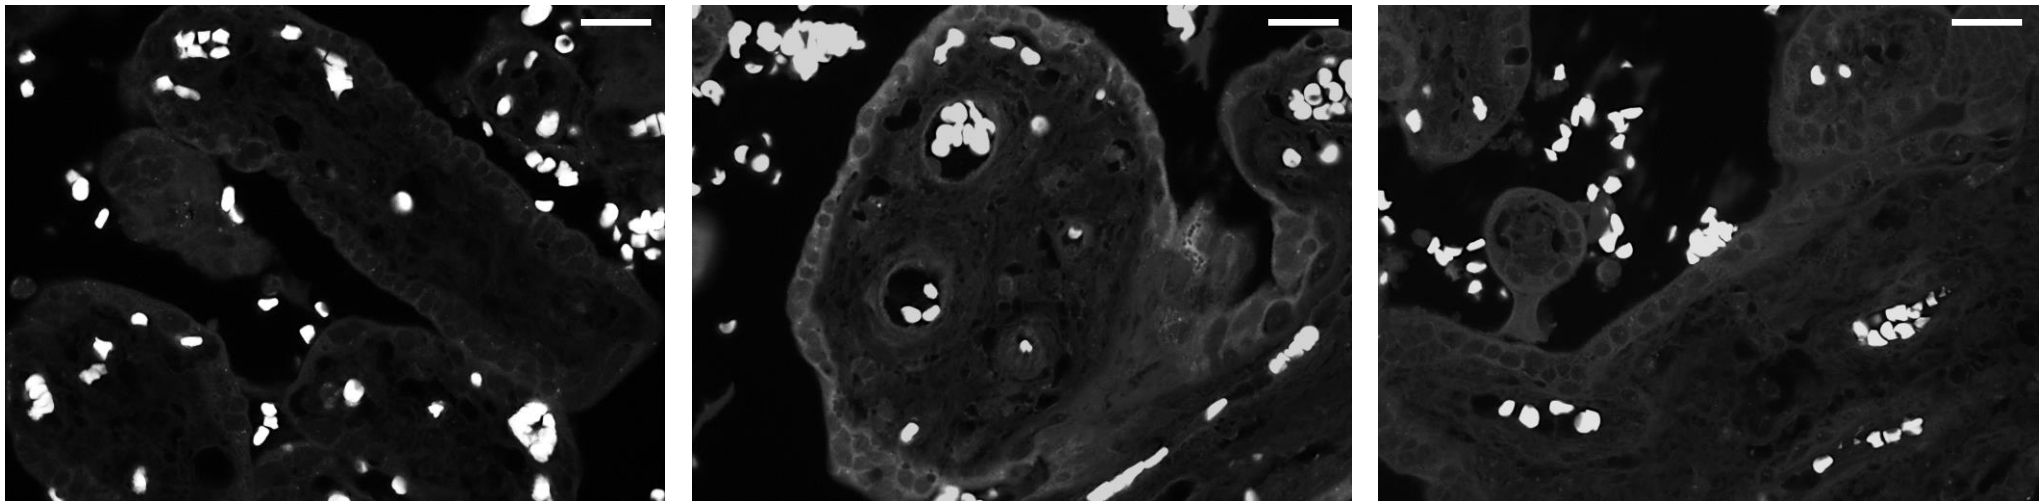

**Figure S1. SARS-CoV-2 RNA detection by Padlock Assay.** Microscope fields (*black and white*) of padlock assay targeting the SARS-CoV-2 RNA in SARS-CoV-2-positive placenta. No specific signals are detectable in sections from a SARS-CoV-2-negative placenta. Scale bar, 20  $\mu$ m.

**Figure S2. Immunostaining of spike protein.** Representative images of the immunofluorescence analysis showing the distribution of spike protein in deparaffinized sections of SARS-CoV-2-positive placenta. No specific signals are detectable in sections from SARS-CoV-2-negative placenta. Nuclei were labelled with DAPI (blue). (both *black and white* and *coloured* microscope fields). Scale bar, 20  $\mu$ m.

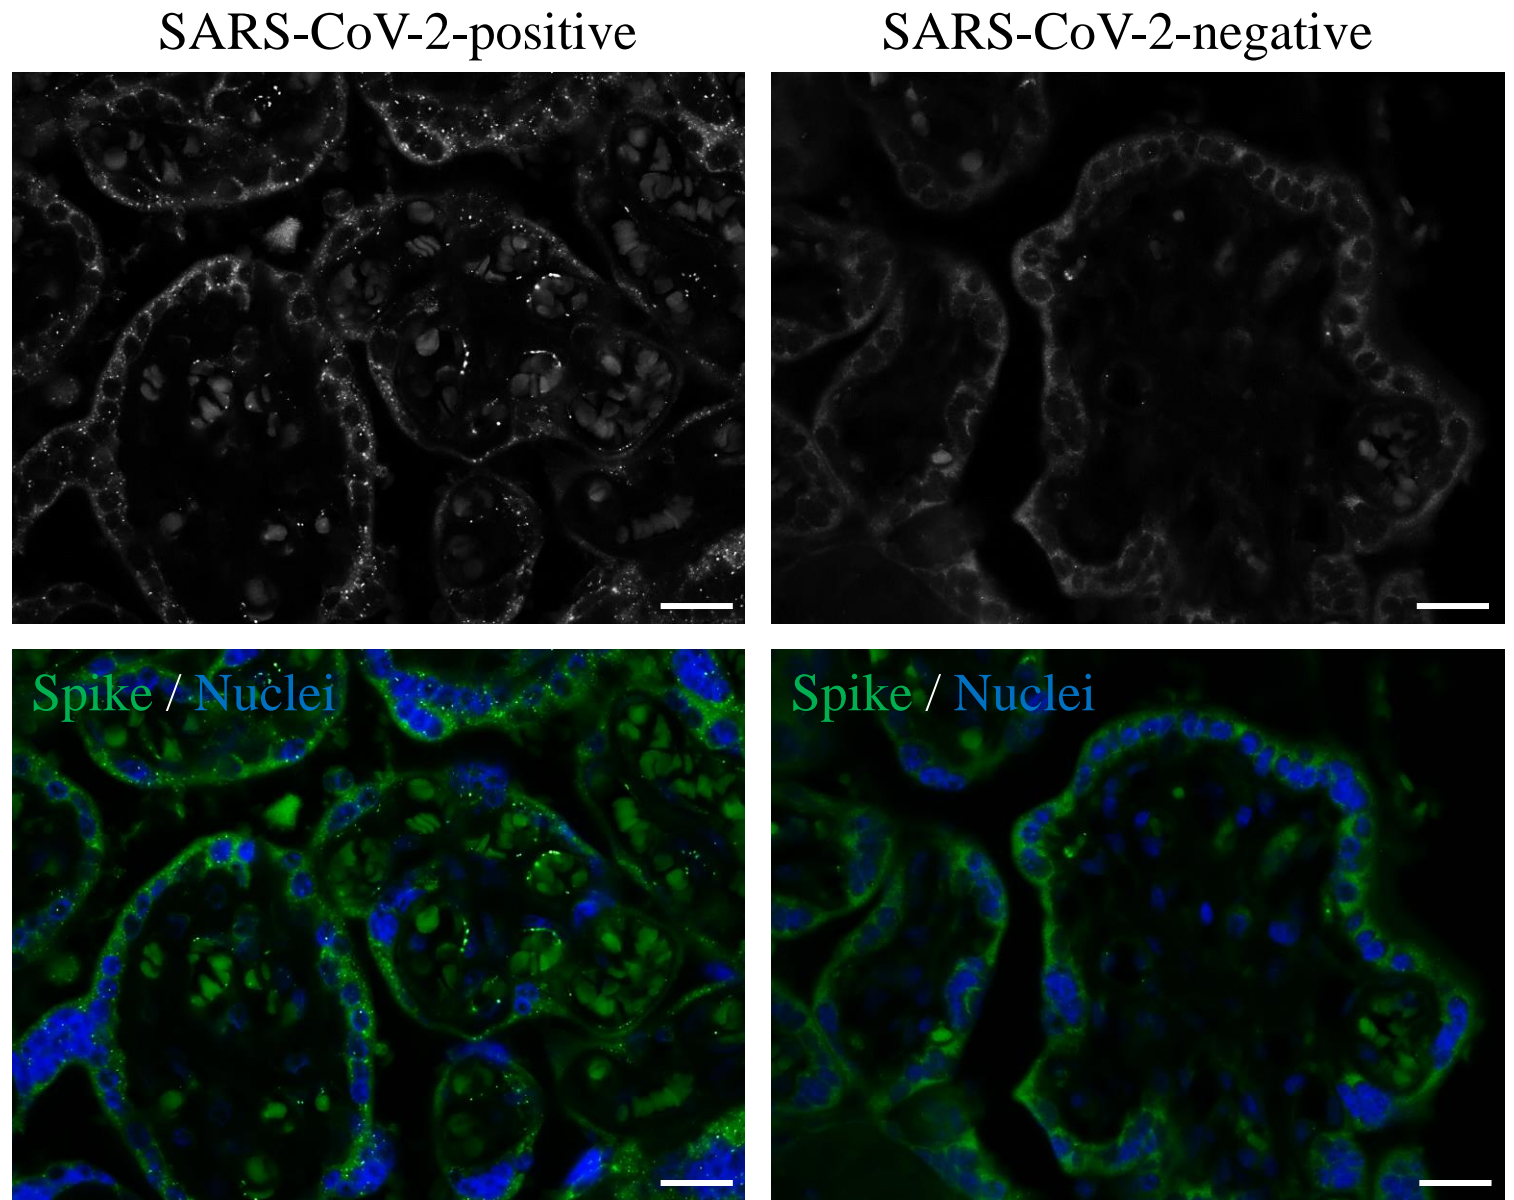

Supplement: s1 [file s1]
